# Supplementary material
Source: PubMed Central journal article supplement (PMC3181356)

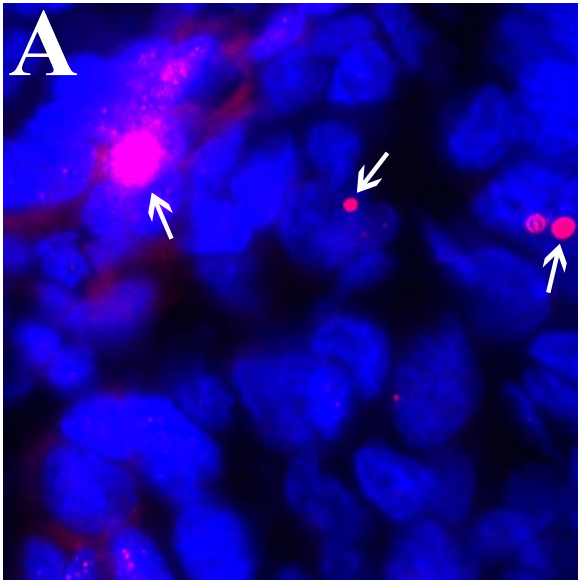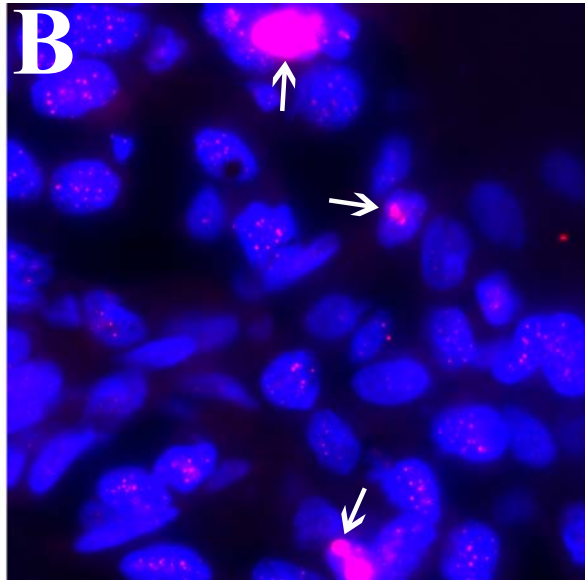

Supplement: mmc3.pdf [file mmc3.pdf]
